# Supplementary material for: Direct Growth of a Polypyrrole Aerogel on Hollow CuS Hierarchical Microspheres Yields Particles with Excellent Electromagnetic Wave Properties
Source: MDPI journal article supplement (doi:10.3390/polym10111286), 2018-11-19
Supplement: s1 [file s1]

# Direct growth of Polypyrrole aerogel on Hollow CuS hierarchical microspheres towards Excellent and Lightweight Electromagnetic Wave absorber

Zhi Zhang <sup>1</sup>, Xuliang Lv <sup>1</sup>, Guangzhen Cui <sup>1</sup>, Mingxu Sui <sup>1</sup>, Songlin Yu <sup>2,\*</sup> and Xiaodong Sun <sup>1,\*</sup>

<sup>1</sup> Key Laboratory of Science and Technology on Electromagnetic Environmental Effects and Electro-optical Engineering, The Army Engineering University, Nanjing, 210007, PR China;

zhang9511@hotmail.com (Z.Z.); xllu1957@126.com (X.L.); cgzjzmz@hotmail.com (C.G.); plasmx@126.com (M.S.)

<sup>2</sup> Research Institute for National Defense Engineering of Academy of Military Science PLA china, Beijing, 100036, PR China;

\* Correspondence: songlinyu@hotmail.com (Y.S.); xiaodongsun1001@hotmail.com (S.X.)

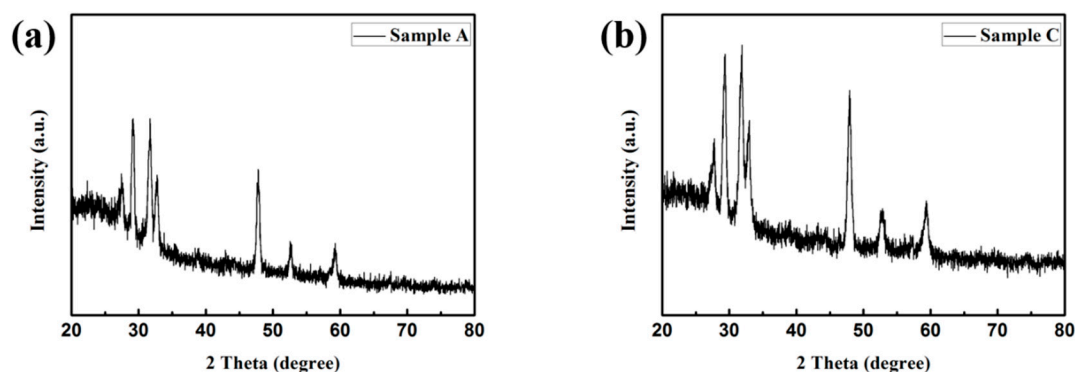

**Figure S1.** XRD patterns of Sample A (a) and Sample B (b).

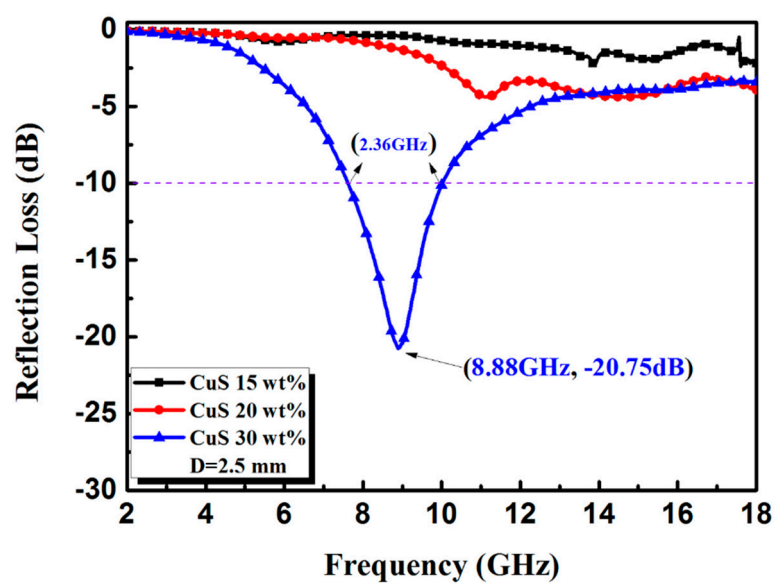

**Figure S2.** Reflection loss curves of paraffin composites containing 15 wt% 20 wt% and 30 wt% CuS under the thickness of 2.5 mm.
